# Supplementary material for: One-Class Classification of Natural Vegetation Using Remote Sensing: A Review
Source: MDPI journal article supplement (doi:10.3390/rs13101892), 2021-05-12
Supplement: s1 [file s1]

**Table S1.** List of abbreviations. The abbreviations included in the text are reported alphabetically.

| Abbreviations | Full form                                                      |
|---------------|----------------------------------------------------------------|
| AIC           | akaike information criterion                                   |
| ALOS          | advanced land observing satellite                              |
| ASTER         | advanced spaceborne thermal emission and reflection radiometer |
| AUC           | area under the curve                                           |
| CORINE        | coordination of information on the environment                 |
| DEM           | digital elevation model                                        |
| DTM           | digital terrain model                                          |
| ESA           | european space agency                                          |
| EUNIS         | european nature information system                             |
| GEE           | Google earth engine                                            |
| GIS           | geographic information system                                  |
| GLM           | generalized linear model                                       |
| HSR           | high spatial resolution                                        |
| ISI           | institute for scientific information                           |
| LSR           | low spatial resolution                                         |
| LULC          | land use and land cover                                        |
| MAXENT        | maximum entropy                                                |
| MODIS         | moderate-resolution imaging spectroradiometer                  |
| MSR           | moderate spatial resolution                                    |
| MSS           | multispectral scanner system                                   |
| NDVI          | normalized difference vegetation index                         |
| OCC           | one-class classifier                                           |
| OLI           | operational land imager                                        |
| PALSAR        | phased array type L-band synthetic aperture radar              |
| PCA           | principal component analysis                                   |
| RADARSAT      | radar satellite                                                |
| RS            | remote sensing                                                 |
| SAR           | synthetic-aperture radar                                       |
| SDM           | species distribution model                                     |
| SNAP          | sentinel application platform                                  |
| SPOT          | satellite pour l'observation de la terre                       |
| SRTM          | shuttle radar topography mission                               |
| SVM           | support vector machine                                         |
| TM            | thematic mapper                                                |
| TRMM          | tropical rainfall measuring mission                            |
| TSS           | true skill statistic                                           |
| UAV           | unmanned aerial vehicle                                        |
| USGS          | United States geological survey                                |
| VHSR          | very high spatial resolution                                   |

|     |                |
|-----|----------------|
| WOS | Web of Science |
|-----|----------------|
