# Supplementary material for: One-Class Classification of Natural Vegetation Using Remote Sensing: A Review
Source: MDPI journal article supplement (doi:10.3390/rs13101892), 2021-05-12
Supplement: s1 [file s1]

Table S2. Categories and questions used to analyze the selected publications

| Categories/questions                                           | Description                                                                    |
|----------------------------------------------------------------|--------------------------------------------------------------------------------|
| A WIDE RANGE OF RS DATA FOR VARIOUS ECOLOGICAL CONSIDERATIONS  |                                                                                |
| A. ECOLOGICAL CONSIDERATIONS                                   |                                                                                |
| <i>A1. What type of area of occupancy was classified?</i>      |                                                                                |
| Potential area                                                 | Potential distribution range of vegetation                                     |
| Actual area                                                    | Effective distribution range of vegetation                                     |
| <i>A2. Which natural vegetation class was classifier?</i>      |                                                                                |
| Land cover                                                     | Vegetation description according to physiognomy (e.g. Shrubs, forests...)      |
| Plant community                                                | Assemblage of plant species (e.g. alliance ...)                                |
| Plant species                                                  | Particular plant species (e.g. threatened or invasive plant species)           |
| <i>A3. How many vegetation classes have been considered?</i>   |                                                                                |
| One-class                                                      | Only one class was classified                                                  |
| Multi-class                                                    | Several classes were classified separately and then compared                   |
| <i>A4. What is the extent of the site to be classified?</i>    |                                                                                |
| Local                                                          | Area < 1,000 km <sup>2</sup> .                                                 |
| Regional                                                       | Area from 1,000 to 100,000 km <sup>2</sup> .                                   |
| National                                                       | Site covering an entirely country                                              |
| Continental                                                    | Site covering an entire continent                                              |
| Global                                                         | Site covering all Earth' terrestrial areas                                     |
| <i>A5. Is there a temporal monitoring?</i>                     |                                                                                |
| No                                                             | Classification is applied to a single period.                                  |
| Yes                                                            | Classification is applied over several years to highlight vegetation dynamics. |
| B. REMOTE SENSING DATA AND VARIABLES                           |                                                                                |
| <i>B1. What spectral type of RS sensor was used?</i>           |                                                                                |
| Optical Multispectral                                          | Passive sensor with 3-20 bands in the visible, infrared and thermal spectrum   |
| Optical Hyperspectral                                          | Passive sensor with > 100 bands in the visible, infrared and thermal spectrum  |
| SAR                                                            | Active sensor with one band in the short-wave spectra                          |
| LiDAR                                                          | Dual-pulse active infrared band sensor                                         |
| <i>B2. What type of platform was used?</i>                     |                                                                                |
| Unmanned airborne                                              | Data acquired by unmanned airborne flying < 200 m asl                          |
| Manned airborne                                                | Data acquired by manned airborne flying between 200 and 1000 m asl             |
| Satellite                                                      | Data acquired by unmanned spaceborne                                           |
| <i>B3. What is the spatial resolution of the RS data used?</i> |                                                                                |
| Very high                                                      | Pixel size < 5 m                                                               |
| High                                                           | Pixel size between 6 and 30 m                                                  |
| Medium                                                         | Pixel size between 31 and 250 m                                                |
| Low                                                            | Pixel size between 251 and 2,000 m                                             |
| <i>B4. How many acquisitions were used?</i>                    |                                                                                |
| Single                                                         | One acquisition was used to capture the ecosystem conditions at a given time.  |

|                                                                                              |                                                                                                            |
|----------------------------------------------------------------------------------------------|------------------------------------------------------------------------------------------------------------|
| Multi-temporal                                                                               | Many acquisitions were used to capture the ecosystem dynamics.                                             |
| Annual time-series                                                                           | A time series was used to characterize ecosystem dynamics.                                                 |
|                                                                                              |                                                                                                            |
| <i>B5. What RS-based variables were used?</i>                                                |                                                                                                            |
| Climate                                                                                      | Land surface temperature and precipitations                                                                |
| Soil                                                                                         | Soil physico-chemical properties (e.g. pH, organic matter content...)                                      |
| Topography                                                                                   | Digital elevation model from the canopy (e.g. SRTM...)                                                     |
| Vegetation                                                                                   | Vegetation biophysical properties (e.g. leaf area index, spectral bands...)                                |
| Categorical                                                                                  | Soil types, LULC (e.g. CORINE Land cover)                                                                  |
| Perturbation                                                                                 | (fire intensity, snow duration...)                                                                         |
|                                                                                              |                                                                                                            |
| <i>B6. What types of non-RS variables were added?</i>                                        |                                                                                                            |
| None                                                                                         | Classification was done using RS-based variables only.                                                     |
| Bioclimatic                                                                                  | Variables extrapolated from weather station networks (e.g. Worldclim)                                      |
| Soil/geological                                                                              | Variables extrapolated from <i>in situ</i> soil and geological surveys                                     |
| Topographical                                                                                | Variables extrapolated from <i>in situ</i> topographical surveys (e.g. national DTM)                       |
|                                                                                              |                                                                                                            |
| C. REFERENCE DATA                                                                            |                                                                                                            |
| <i>C1. What types of reference data were used for classification fitting and validation?</i> |                                                                                                            |
| Vegetation database                                                                          | Field vegetation plots extracted from existing databases (e.g. Museum inventories...)                      |
| Field collection                                                                             | Field vegetation plots collected during the experiment                                                     |
| Image collection                                                                             | Data collected on the desk by analysis of very high spatial resolution imagery (e.g. UAV, Google Earth...) |
|                                                                                              |                                                                                                            |
| <i>C2. How many reference data were used per vegetation unit?</i>                            |                                                                                                            |
| Very sparse                                                                                  | < 10                                                                                                       |
| Sparse                                                                                       | 10 – 50                                                                                                    |
| Moderate                                                                                     | 50 – 100                                                                                                   |
| Large                                                                                        | 100 – 1,000                                                                                                |
| Very large                                                                                   | > 1,000                                                                                                    |
|                                                                                              |                                                                                                            |
| RS AND OCC: TOOLS AND SETTINGS                                                               |                                                                                                            |
| D. TOOLS AND COMPUTER RESOURCES                                                              |                                                                                                            |
| <i>D1. What tools were used for the classification?</i>                                      |                                                                                                            |
| Open-source softwares                                                                        | Free software and packages were used (e.g. R, Python, Whitebox, SAGA...)                                   |
| Commercial softwares                                                                         | Paid software was used (e.g. MATLAB, ENVI, SPSS...)                                                        |
|                                                                                              |                                                                                                            |
| <i>D2. What computer resources were used for processing?</i>                                 |                                                                                                            |
| Local computing                                                                              | Processing was run on PCs locally based within the labs.                                                   |
| Cloud computing                                                                              | Processing was run from distant servers (e.g. GEE, ESA...).                                                |
|                                                                                              |                                                                                                            |
| E. VARIABLES SELECTION AND COLLINEARITY                                                      |                                                                                                            |
| <i>E1. How was the initial variable dataset chosen?</i>                                      |                                                                                                            |
| Expert                                                                                       | Pre-selection based on expert knowledge of the site specificity.                                           |
| Literature                                                                                   | Pre-selection based on ecological knowledge.                                                               |
| Data mining                                                                                  | No <i>a priori</i> pre-selection, all possible variables were used.                                        |
|                                                                                              |                                                                                                            |
| <i>E2. How were the correlated variables addressed?</i>                                      |                                                                                                            |

|                                                                                          |                                                                                     |
|------------------------------------------------------------------------------------------|-------------------------------------------------------------------------------------|
| Classifier-based                                                                         | Let the classifier select the most informative variables                            |
| Expert-based                                                                             | Selection based on ecological knowledge of the vegetation class                     |
| Statistical-based                                                                        | Selection based on statistical indices (e.g. correlation, VIF, AIC, permutation...) |
| Reduction                                                                                | Synthetic variables were produced (e.g. MNF, PCA...)                                |
|                                                                                          |                                                                                     |
| F. CLASSIFIER SELECTION                                                                  |                                                                                     |
| <i>F1. Which type of classifier was used?</i>                                            |                                                                                     |
| Machine learning                                                                         | RF / BSVM / Maxent / GLM / GAM                                                      |
| Ensemble classifier                                                                      | Combination of multiple classifiers                                                 |
| Deep learning                                                                            | CNN                                                                                 |
| Genetic learning                                                                         | Evolutionary algorithm                                                              |
|                                                                                          |                                                                                     |
| <i>F2. Which type of classifier provides the best results?</i>                           |                                                                                     |
| Non applicable                                                                           | Only one type of classifier was evaluated                                           |
| Equivalent                                                                               | No significant differences between classifiers were observed                        |
| Classifier name                                                                          | Name of the best classifier                                                         |
|                                                                                          |                                                                                     |
| G. BACKGROUND POINTS SELECTION                                                           |                                                                                     |
| <i>G1. How many background points were used?</i>                                         |                                                                                     |
| Small                                                                                    | < 10,000 points                                                                     |
| Default                                                                                  | 10,000 points                                                                       |
| Large                                                                                    | > 10,000 points                                                                     |
| Unspecified                                                                              |                                                                                     |
| Non applicable                                                                           | Absence points were used                                                            |
|                                                                                          |                                                                                     |
| <i>G2. Has spatial sampling bias been considered?</i>                                    |                                                                                     |
| No                                                                                       | The background points were selected randomly across the landscape.                  |
| Yes                                                                                      | Background points were selected close to occurrence points.                         |
| Non applicable                                                                           | Absence points were used                                                            |
|                                                                                          |                                                                                     |
| <i>G3. Have the background points been selected according to land use/land cover?</i>    |                                                                                     |
| All landscape                                                                            | The background points were selected regardless of LULC.                             |
| Distribution area                                                                        | Convex hull covering the full extent of the known occurrence's distribution         |
| Natural areas                                                                            | Background points have been selected only in natural areas                          |
| Artificial areas                                                                         | Background points have been selected only in artificial areas.                      |
| Unspecified                                                                              |                                                                                     |
| Non applicable                                                                           | Absence points were used                                                            |
|                                                                                          |                                                                                     |
| <i>G4. Have background points been selected in close proximity of occurrence points?</i> |                                                                                     |
| Yes                                                                                      | Some background points may overlap with occurrence points.                          |
| No                                                                                       | A constraint of minimum distance to occurrence points was applied.                  |
| Unspecified                                                                              |                                                                                     |
| Non applicable                                                                           | Absence points were used                                                            |
|                                                                                          |                                                                                     |
| H. CLASSIFIER TUNING                                                                     |                                                                                     |
| <i>H1. What type of tuning is desired?</i>                                               |                                                                                     |
| None                                                                                     | No tuning, classifier default settings were used                                    |
| Best performance                                                                         | The best classification performance is targeted (e.g. AUC, F-score...)              |
| Best transferability                                                                     | The lowest classification over-fitting is targeted (e.g. AIC...)                    |

|                                                                                                         |                                                                                                                                                        |
|---------------------------------------------------------------------------------------------------------|--------------------------------------------------------------------------------------------------------------------------------------------------------|
| Unspecified                                                                                             |                                                                                                                                                        |
|                                                                                                         |                                                                                                                                                        |
| I. THRESHOLDING                                                                                         |                                                                                                                                                        |
| <i>I1. At what stage(s) does thresholding occur?</i>                                                    |                                                                                                                                                        |
| Never                                                                                                   | The classifier has been tuned and validated using threshold-free metrics (e.g. AUC), and the maps were expressed as continuous occurrence probability. |
| Tuning/validation                                                                                       | The classifier has been tuned and validated using thresholding-dependent metrics (e.g. F-score, Kappa ...).                                            |
| Categorical mapping                                                                                     | A threshold has been applied to convert the continuous map into a categorical map (e.g. presence/absence, low/medium/high...).                         |
|                                                                                                         |                                                                                                                                                        |
| <i>I2. If applicable, on what criterion was the threshold based?</i>                                    |                                                                                                                                                        |
| Default                                                                                                 | A default threshold value has been chosen (e.g. 0 for SVM, 0.5 for Maxent...)                                                                          |
| Statistical                                                                                             | Threshold set on a trade-off between sensitivity and specificity (e.g. TSS, Max SS...)                                                                 |
| Expert-based                                                                                            | Threshold set by experts according to the output probability map.                                                                                      |
| Unspecified                                                                                             |                                                                                                                                                        |
|                                                                                                         |                                                                                                                                                        |
| J. CLASSIFICATION ACCURACY ASSESSMENT                                                                   |                                                                                                                                                        |
| <i>J1. Was spatial autocorrelation considered during the accuracy assessment of the classification?</i> |                                                                                                                                                        |
| No                                                                                                      | Training and validation samples can be spatially close.                                                                                                |
| Yes                                                                                                     | The validation samples were selected with a minimum distance to the training samples.                                                                  |
|                                                                                                         |                                                                                                                                                        |
| <i>J2. Is classification validation performed on independent plots?</i>                                 |                                                                                                                                                        |
| No                                                                                                      | The same plots were used for tuning and validating the classifier (e.g. cross-validation...).                                                          |
| Yes                                                                                                     | Independent plots were used to validate the classification accuracy.                                                                                   |
|                                                                                                         |                                                                                                                                                        |
| <i>J3. On which criterion(s) was based the classification accuracy assessment?</i>                      |                                                                                                                                                        |
| Best performance                                                                                        | Minimize under-detection and over-detection (e.g. F1-score, AUC, Kappa...)                                                                             |
| Spatial uncertainty                                                                                     | The categorical maps of each classification are overlaid to point out inconsistency areas.                                                             |
| Best transferability                                                                                    | Minimize over-fitting (e.g. AUC train – AUC test, AIC...)                                                                                              |
| Expert-based                                                                                            | Visual assessment of the output map                                                                                                                    |
|                                                                                                         |                                                                                                                                                        |
| <i>J4. What type of data was used to estimate over-detection?</i>                                       |                                                                                                                                                        |
| Pseudo-absence                                                                                          | Background points are used as pseudo-absence data.                                                                                                     |
| True absence                                                                                            | True-absence points are used (e.g. land use map, additional field plots...)                                                                            |
|                                                                                                         |                                                                                                                                                        |
| <i>J5. If applicable, how are the specific classifiers for each vegetation unit combined together?</i>  |                                                                                                                                                        |
| Independent                                                                                             | Classifications for each vegetation unit are compared independently                                                                                    |
| Higher probability                                                                                      | Assignment for each pixel of the class with the highest probability                                                                                    |
| Categorical map addition                                                                                | Each pixel can be characterized by multiple vegetation units (e.g. species richness).                                                                  |
