# Supplementary material for: One-Class Classification of Natural Vegetation Using Remote Sensing: A Review
Source: MDPI journal article supplement (doi:10.3390/rs13101892), 2021-05-12
Supplement: s1 [file s1]

**Table S1 - List of the reviewed publications**

- Adepoju, K.A., et S.A. Adelabu. « Improving accuracy evaluation of Landsat-8 OLI using image composite and multisource data with Google Earth Engine ». *Remote Sensing Letters* 11, no 2 (2020): 107 16. <https://doi.org/10.1080/2150704X.2019.1690792>.
- Adhikari, Dibyendu, Aabid Hussain Mir, Krishna Upadhaya, Viheno Iralu, et Dilip Kumar Roy. « Abundance and habitat-suitability relationship deteriorate in fragmented forest landscapes: a case of *Adinandra griffithii* Dyer, a threatened endemic tree from Meghalaya in northeast India ». *Ecological Processes* 7, no 1 (22 janvier 2018): 3. <https://doi.org/10.1186/s13717-018-0114-z>.
- Aguilar-Soto, V., A. Melgoza-Castillo, F. Villarreal-Guerrero, C. Wehenkel, et C. Pinedo-Alvarez. « Modeling the potential distribution of *Picea chihuahuana* Martínez, an endangered species at the Sierra Madre Occidental, Mexico ». *Forests* 6, no 3 (2015): 692 707. <https://doi.org/10.3390/f6030692>.
- Aguirre-Gutierrez, Jesus, Hector M. Serna-Chavez, Alma R. Villalobos-Arambula, Jorge A. Perez de la Rosa, et Niels Raes. « Similar but not equivalent: ecological niche comparison across closely-related Mexican white pines ». *Diversity and Distributions* 21, no 3 (mars 2015): 245 57. <https://doi.org/10.1111/ddi.12268>.
- Alexandridis, T.K., A.A. Tamouridou, X.E. Pantazi, A.L. Lagopodi, J. Kashefi, G. Ovakoglou, V. Polychronos, et D. Moshou. « Novelty detection classifiers in weed mapping: *Silybum marianum* detection on UAV multispectral images ». *Sensors (Switzerland)* 17, no 9 (2017). <https://doi.org/10.3390/s17092007>.
- Álvarez-Martínez, Jose Manuel, Borja Jiménez-Alfaro, José Barquín, Bárbara Ondiviela, María Recio, Ana Silió-Calzada, et Jose Antonio Juanes. « Modelling the area of occupancy of habitat types with remote sensing ». *Methods in Ecology and Evolution* 9, no 3 (2018): 580 93.
- Amici, Valerio, Matteo Marcantonio, Nicola La Porta, et Duccio Rocchini. « A Multi-Temporal Approach in MaxEnt Modelling: A New Frontier for Land Use/Land Cover Change Detection ». *Ecological Informatics* 40 (1 juillet 2017): 40 49. <https://doi.org/10.1016/j.ecoinf.2017.04.005>.
- Amiri, M., M. Tarkesh, R. Jafari, et G. Jetschke. « Bioclimatic variables from precipitation and temperature records vs. remote sensing-based bioclimatic variables: Which side can perform better in species distribution modeling? ». *Ecological Informatics* 57 (2020). <https://doi.org/10.1016/j.ecoinf.2020.101060>.
- Anjos, Luciano J. S., et Peter Mann de Toledo. « Measuring Resilience and Assessing Vulnerability of Terrestrial Ecosystems to Climate Change in South America ». *PLOS ONE* 13, no 3 (19 mars 2018): e0194654. <https://doi.org/10.1371/journal.pone.0194654>.
- Araya-López, Rocío A., Javier Lopatin, Fabian E. Fassnacht, et H. Jaime Hernández. « Monitoring Andean High Altitude Wetlands in Central Chile with Seasonal Optical Data: A Comparison between Worldview-2 and Sentinel-2 Imagery ». *ISPRS Journal of Photogrammetry and Remote Sensing, SI: Latin America Issue*, 145 (1 novembre 2018): 213 24. <https://doi.org/10.1016/j.isprsjprs.2018.04.001>.
- Arenas-Castro, S., A. Regos, J.F. Gonçalves, D. Alcaraz-Segura, et J. Honrado. « Remotely sensed variables of ecosystem functioning support robust predictions of abundance patterns for rare species ». *Remote Sensing* 11, no 18 (2019). <https://doi.org/10.3390/rs11182086>.
- Arenas-Castro, Salvador, Joao Goncalves, Paulo Alves, Domingo Alcaraz-Segura, et Joao P. Honrado. « Assessing the multi-scale predictive ability of ecosystem functional attributes for species distribution modelling ». *Plos One* 13, no 6 (18 juin 2018): e0199292. <https://doi.org/10.1371/journal.pone.0199292>.
- Attanayake, A.U., D. Xu, X. Guo, et E.G. Lamb. « Long-term sand dune spatio-temporal dynamics and endemic plant habitat extent in the Athabasca sand dunes of northern Saskatchewan ». *Remote Sensing in Ecology and Conservation* 5, no 1 (2019): 70 86. <https://doi.org/10.1002/rse2.90>.
- Baldeck, C.A., et G.P. Asner. « Single-Species Detection with Airborne Imaging Spectroscopy Data: A Comparison of Support Vector Techniques ». *IEEE Journal of Selected Topics in Applied Earth Observations and Remote Sensing* 8, no 6 (2015): 2501 12. <https://doi.org/10.1109/JSTARS.2014.2346475>.

Baldeck, Claire A., Gregory P. Asner, Robin E. Martin, Christopher B. Anderson, David E. Knapp, James R. Kellner, et S. Joseph Wright. « Operational tree species mapping in a diverse tropical forest with airborne imaging spectroscopy ». *PloS one* 10, no 7 (2015).

Baumbach, Lukas, Aidin Niamir, Thomas Hickler, et Rasoul Yousefpour. « Regional adaptation of European beech (*Fagus sylvatica*) to drought in Central European conditions considering environmental suitability and economic implications ». *Regional Environmental Change* 19, no 4 (avril 2019): 1159-74. <https://doi.org/10.1007/s10113-019-01472-0>.

Bazzichetto, M., M. Malavasi, A. T. R. Acosta, et M. L. Carranza. « How does dune morphology shape coastal EC habitats occurrence? A remote sensing approach using airborne LiDAR on the Mediterranean coast ». *Ecological Indicators* 71 (décembre 2016): 618-26. <https://doi.org/10.1016/j.ecolind.2016.07.044>.

Bazzichetto, Manuele, Marco Malavasi, Vojtech Bartak, Alicia Teresa Rosario Acosta, Vitezslav Moudry, et Maria Laura Carranza. « Modeling plant invasion on Mediterranean coastal landscapes: An integrative approach using remotely sensed data ». *Landscape and Urban Planning* 171 (mars 2018): 98-106. <https://doi.org/10.1016/j.landurbplan.2017.11.006>.

Bazzichetto, Manuele, Marco Malavasi, Vojtech Bartak, Alicia Teresa Rosario Acosta, Duccio Rocchini, et Maria Laura Carranza. « Plant invasion risk: A quest for invasive species distribution modelling in managing protected areas ». *Ecological Indicators* 95 (décembre 2018): 311-19. <https://doi.org/10.1016/j.ecolind.2018.07.046>.

Bhandari, Maneesh S., Rajendra K. Meena, Rajeev Shankhwar, Chander Shekhar, Jalaj Saxena, Rama Kant, Vijay V. Pandey, et al. « Prediction Mapping Through Maxent Modeling Paves the Way for the Conservation of *Rhododendron arboreum* in Uttarakhand Himalayas ». *Journal of the Indian Society of Remote Sensing* 48, no 3 (mars 2020): 411-22. <https://doi.org/10.1007/s12524-019-01089-0>.

Bloom, T.D.S., A. Flower, M. Medler, et E.G. DeChaine. « The compounding consequences of wildfire and climate change for a high-elevation wildflower (*Saxifraga austromontana*) ». *Journal of Biogeography* 45, no 12 (2018): 2755-65. <https://doi.org/10.1111/jbi.13441>.

Bobrowski, Maria, Benjamin Bechtel, Juergen Boehner, Jens Oldeland, Johannes Weidinger, et Udo Schickhoff. « Application of Thermal and Phenological Land Surface Parameters for Improving Ecological Niche Models of *Betula utilis* in the Himalayan Region ». *Remote Sensing* 10, no 6 (juin 2018): 814. <https://doi.org/10.3390/rs10060814>.

Bricher, P.K., A. Lucieer, J. Shaw, A. Terauds, et D.M. Bergstrom. « Mapping Sub-Antarctic Cushion Plants Using Random Forests to Combine Very High Resolution Satellite Imagery and Terrain Modelling ». *PLoS ONE* 8, no 8 (2013). <https://doi.org/10.1371/journal.pone.0072093>.

Buse, Joern, Steffen Boch, Joerg Hilgersd, et Eva Maria Griebeler. « Conservation of threatened habitat types under future climate change - Lessons from plant-distribution models and current extinction trends in southern Germany ». *Journal for Nature Conservation* 27 (septembre 2015): 18-25. <https://doi.org/10.1016/j.jnc.2015.06.001>.

Campos, Valeria E., Flavio M. Cappa, Fernández Maldonado Viviana, et Stella M. Giannoni. « Using remotely sensed data to model suitable habitats for tree species in a desert environment ». *Journal of Vegetation Science* 27, no 1 (2016): 200-210.

Carlson, Bradley Z., Damien Georges, Antoine Rabatel, Christophe F. Randin, Julien Renaud, Anne Delestrade, Niklaus E. Zimmermann, Philippe Choler, et Wilfried Thuiller. « Accounting for tree line shift, glacier retreat and primary succession in mountain plant distribution models ». *Diversity and Distributions* 20, no 12 (décembre 2014): 1379-91. <https://doi.org/10.1111/ddi.12238>.

Case, M.J., et K.A. Stinson. « Climate change impacts on the distribution of the allergenic plant, common ragweed (*Ambrosia artemisiifolia*) in the eastern United States ». *PLoS ONE* 13, no 10 (2018). <https://doi.org/10.1371/journal.pone.0205677>.

Chiang, S.-H., et M. Valdez. « Tree species classification by integrating satellite imagery and topographic variables using maximum entropy method in a Mongolian forest ». *Forests* 10, no 11 (2019). <https://doi.org/10.3390/f10110961>.

Chignell, Stephen M., Matthew W. Luizza, Sky Skach, Nicholas E. Young, et Paul H. Evangelista. « An integrative modeling approach to mapping wetlands and riparian areas in a heterogeneous Rocky Mountain watershed ». *Remote Sensing in Ecology and Conservation* 4, no 2 (juin 2018): 150 65. <https://doi.org/10.1002/rse2.63>.

Clark, John, Yeqiao Wang, et Peter V. August. « Assessing current and projected suitable habitats for tree-of-heaven along the Appalachian Trail ». *Philosophical Transactions of the Royal Society B-Biological Sciences* 369, no 1643 (26 mai 2014): 20130192. <https://doi.org/10.1098/rstb.2013.0192>.

Connor, Thomas, Vanessa Hull, Andres Vina, Ashton Shortridge, Ying Tang, Jindong Zhang, Fang Wang, et Jianguo Liu. « Effects of grain size and niche breadth on species distribution modeling ». *Ecography* 41, no 8 (août 2018): 1270 82. <https://doi.org/10.1111/ecog.03416>.

Cord, Anna F., Doris Klein, David S. Gernandt, Jorge A. Perez de la Rosa, et Stefan Dech. « Remote sensing data can improve predictions of species richness by stacked species distribution models: a case study for Mexican pines ». *Journal of Biogeography* 41, no 4 (avril 2014): 736 48. <https://doi.org/10.1111/jbi.12225>.

Cord, Anna F., Doris Klein, Franz Mora, et Stefan Dech. « Comparing the suitability of classified land cover data and remote sensing variables for modeling distribution patterns of plants ». *Ecological Modelling* 272 (24 janvier 2014): 129 40. <https://doi.org/10.1016/j.ecolmodel.2013.09.011>.

Crego, Ramiro D., Karl A. Didier, et Clayton K. Nielsen. « Modeling meadow distribution for conservation action in arid and semi-arid Patagonia, Argentina ». *Journal of Arid Environments* 102 (mars 2014): 68 75. <https://doi.org/10.1016/j.jaridenv.2013.11.008>.

Deblauwe, V., V. Droissart, R. Bose, B. Sonke, A. Blach-Overgaard, J.-C. Svenning, J. J. Wieringa, B. R. Ramesh, T. Stevart, et T. L. P. Couvreur. « Remotely sensed temperature and precipitation data improve species distribution modelling in the tropics ». *Global Ecology and Biogeography* 25, no 4 (avril 2016): 443 54. <https://doi.org/10.1111/geb.12426>.

Delalay, Marie, Varun Tiwari, Alan D. Ziegler, Vik Gopal, et Paul Passy. « Land-use and land-cover classification using Sentinel-2 data and machine-learning algorithms: operational method and its implementation for a mountainous area of Nepal ». *Journal of Applied Remote Sensing* 13, no 1 (28 mars 2019): 014530. <https://doi.org/10.1117/1.JRS.13.014530>.

Diao, C., et L. Wang. « Development of an invasive species distribution model with fine-resolution remote sensing ». *International Journal of Applied Earth Observation and Geoinformation* 30, no 1 (2014): 65 75. <https://doi.org/10.1016/j.jag.2014.01.015>.

Duff, T.J., T.L. Bell, et A. York. « Recognising fuzzy vegetation pattern: The spatial prediction of floristically defined fuzzy communities using species distribution modelling methods ». *Journal of Vegetation Science* 25, no 2 (2014): 323 37. <https://doi.org/10.1111/jvs.12092>.

Engler, R., L.T. Waser, N.E. Zimmermann, M. Schaub, S. Berdos, C. Ginzler, et A. Psomas. « Combining ensemble modeling and remote sensing for mapping individual tree species at high spatial resolution ». *Forest Ecology and Management* 310 (2013): 64 73. <https://doi.org/10.1016/j.foreco.2013.07.059>.

Enrique Hernandez-Lambrano, Ricardo, David Rodriguez de la Cruz, et Jose Angel Sanchez-Agudo. « Spatial oak decline models to inform conservation planning in the Central-Western Iberian Peninsula ». *Forest Ecology and Management* 441 (1 juin 2019): 115 26. <https://doi.org/10.1016/j.foreco.2019.03.028>.

Fedrigo, Melissa, Stephen B. Stewart, Stephen H. Roxburgh, Sabine Kasel, Lauren T. Bennett, Helen Vickers, et Craig R. Nitschke. « Predictive Ecosystem Mapping of South-Eastern Australian Temperate Forests Using Lidar-Derived Structural Profiles and Species Distribution Models ». *Remote Sensing* 11, no 1 (1 janvier 2019): 93. <https://doi.org/10.3390/rs11010093>.

Fernandez, Ignacio C., et Narkis S. Morales. « One-class land-cover classification using MaxEnt: the effect of modelling parameterization on classification accuracy ». *PeerJ* 7 (27 mai 2019): e7016. <https://doi.org/10.7717/peerj.7016>.

Flessner, Brandon, Mary C. Henry, et Jerry Green. « Species Distribution Modeling of American Beech (*Fagus Grandifolia*) Distribution in Southwest Ohio ». *International Journal of Applied Geospatial Research* 8, no 3 (septembre 2017): 16 36. <https://doi.org/10.4018/ijagr.2017070102>.

Fois, Mauro, Alba Cuena-Lombraña, Giuseppe Fenu, et Gianluigi Bacchetta. « Using species distribution models at local scale to guide the search of poorly known species: Review, methodological issues and future directions ». *Ecological Modelling* 385 (2018): 124 32.

Girma, Atkilt, C. A. J. M. de Bie, Andrew K. Skidmore, Valentijn Venus, et Frans Bongers. « Hyper-temporal SPOT-NDVI dataset parameterization captures species distributions ». *International Journal of Geographical Information Science* 30, no 1 (2 janvier 2016): 89 107. <https://doi.org/10.1080/13658816.2015.1082565>.

Gonçalves, João, Paulo Alves, Isabel Pôças, Bruno Marcos, Rita Sousa-Silva, Ângela Lomba, et João Pradinho Honrado. « Exploring the Spatiotemporal Dynamics of Habitat Suitability to Improve Conservation Management of a Vulnerable Plant Species ». *Biodiversity and Conservation* 25, no 14 (1 décembre 2016): 2867 88. <https://doi.org/10.1007/s10531-016-1206-7>.

Halmy, M.W.A., M. Fawzy, D.A. Ahmed, N.M. Saeed, et M.A. Awad. « Monitoring and predicting the potential distribution of alien plant species in arid ecosystem using remotely-sensed data ». *Remote Sensing Applications: Society and Environment* 13 (2019): 69 84. <https://doi.org/10.1016/j.rsase.2018.10.005>.

Halvorsen, R., S. Mazzoni, J.W. Dirksen, E. Næsset, T. Gobakken, et M. Ohlson. « How important are choice of model selection method and spatial autocorrelation of presence data for distribution modelling by MaxEnt? » *Ecological Modelling* 328 (2016): 108 18. <https://doi.org/10.1016/j.ecolmodel.2016.02.021>.

Hengl, Tomislav, Markus G. Walsh, Jonathan Sanderman, Ichsani Wheeler, Sandy P. Harrison, et Iain C. Prentice. « Global Mapping of Potential Natural Vegetation: An Assessment of Machine Learning Algorithms for Estimating Land Potential ». *PeerJ* 6 (22 août 2018): e5457. <https://doi.org/10.7717/peerj.5457>.

Horvath, Peter, Rune Halvorsen, Frode Stordal, Lena Merete Tallaksen, Hui Tang, et Anders Bryn. « Distribution modelling of vegetation types based on area frame survey data ». *Applied Vegetation Science* 22, no 4 (octobre 2019): 547 60. <https://doi.org/10.1111/avsc.12451>.

Iannella, Mattia, Walter De Simone, Paola D'Alessandro, Giulia Console, et Maurizio Biondi. « Investigating the Current and Future Co-Occurrence of *Ambrosia artemisiifolia* and *Ophraella communis* in Europe through Ecological Modelling and Remote Sensing Data Analysis ». *International journal of environmental research and public health* 16, no 18 (2019): 3416.

Ishii, Jun, et Izumi Washitani. « Early detection of the invasive alien plant *Solidago altissima* in moist tall grassland using hyperspectral imagery ». *International Journal of Remote Sensing* 34, no 16 (20 août 2013): 5926 36. <https://doi.org/10.1080/01431161.2013.799790>.

Iverson, Louis R., Joanne Rebeck, Matthew P. Peters, Todd Hutchinson, et Timothy Fox. « Predicting *Ailanthus altissima* presence across a managed forest landscape in southeast Ohio ». *Forest Ecosystems* 6, no 1 (2 octobre 2019). <https://doi.org/10.1186/s40663-019-0198-7>.

Jiang, Y., T. Wang, Y. Wu, R. Hu, K. Huang, et X. Shao. « Past distribution of epiphyllous liverworts in China: The usability of historical data ». *Ecology and Evolution* 8, no 15 (2018): 7436 50. <https://doi.org/10.1002/ece3.4274>.

Jiang, Yanbin, Tiejun Wang, C. A. J. M. de Bie, A. K. Skidmore, Xuehua Liu, Shanshan Song, Li Zhang, Jian Wang, et Xiaoming Shao. « Satellite-derived vegetation indices contribute significantly to the prediction of epiphyllous liverworts ». *Ecological Indicators* 38 (mars 2014): 72 80. <https://doi.org/10.1016/j.ecolind.2013.10.024>.

José-Silva, Leandro, Reginaldo Carvalho dos Santos, Bruna Martins de Lima, Mendelson Lima, José Francisco de Oliveira-Júnior, Paulo Eduardo Teodoro, Pedro V. Eisenlohr, et Carlos Antonio da Silva Junior. « Improving the Validation of Ecological Niche Models with Remote Sensing Analysis ». *Ecological Modelling* 380 (24 juillet 2018): 22 30. <https://doi.org/10.1016/j.ecolmodel.2018.04.013>.

Judith, Caroline, Julio V. Schneider, Marco Schmidt, Rengifo Ortega, Juan Gaviria, et Georg Zizka. « Using high-resolution remote sensing data for habitat suitability models of Bromeliaceae in the city of Merida, Venezuela ». *Landscape and Urban Planning* 120 (décembre 2013): 107 18. <https://doi.org/10.1016/j.landurbplan.2013.08.012>.

Kang, Wanmo, Youngkeun Song, Dongkun Lee, GoWoon Kim, et Heemyung Chae. « Identifying habitats and corridors of an invasive plant, *Ageratina altissima*, in an urban forest ». *Landscape and Ecological Engineering* 15, no 3 (juillet 2019): 277 87. <https://doi.org/10.1007/s11355-019-00381-y>.

Kattenborn, Teja, Jana Eichel, et Fabian Ewald Fassnacht. « Convolutional Neural Networks enable efficient, accurate and fine-grained segmentation of plant species and communities from high-resolution UAV imagery ». *Scientific reports* 9, no 1 (2019): 1 9.

Kattenborn, Teja, Jana Eichel, Susan Wiser, Larry Burrows, Fabian E. Fassnacht, et Sebastian Schmidtlein. « Convolutional Neural Networks accurately predict cover fractions of plant species and communities in Unmanned Aerial Vehicle imagery ». *Remote Sensing in Ecology and Conservation*, 2020.

Kattenborn, Teja, Javier Lopatin, Michael Förster, Andreas Christian Braun, et Fabian Ewald Fassnacht. « UAV data as alternative to field sampling to map woody invasive species based on combined Sentinel-1 and Sentinel-2 data ». *Remote sensing of environment* 227 (2019): 61 73.

Keppel, G., T.P. Robinson, G.W. Wardell-Johnson, C.J. Yates, K.P. Van Niel, M. Byrne, et A.G.T. Schut. « A low-altitude mountain range as an important refugium for two narrow endemics in the Southwest Australian Floristic Region biodiversity hotspot ». *Annals of Botany* 119, no 2 (2017): 289 300. <https://doi.org/10.1093/aob/mcw182>.

Keshtkar, Hamidreza, et Winfried Voigt. « Potential impacts of climate and landscape fragmentation changes on plant distributions: Coupling multi-temporal satellite imagery with GIS-based cellular automata model ». *Ecological Informatics* 32 (mars 2016): 145 55. <https://doi.org/10.1016/j.ecoinf.2016.02.002>.

Kim, Ji Yoon, Gu-Yeon Kim, Yuno Do, Hee-Sun Park, et Gea-Jae Joo. « Relative importance of hydrological variables in predicting the habitat suitability of *Euryale ferox* Salisb ». *Journal of Plant Ecology* 11, no 2 (avril 2018): 169 79. <https://doi.org/10.1093/jpe/rtw106>.

Koch, Robert, Jarcilene S. Almeida-Cortez, et Birgit Kleinschmit. « Revealing areas of high nature conservation importance in a seasonally dry tropical forest in Brazil: Combination of modelled plant diversity hot spots and threat patterns ». *Journal for Nature Conservation* 35 (février 2017): 24 39. <https://doi.org/10.1016/j.jnc.2016.11.004>.

Kolanowska, M. « The naturalization status of African Spotted Orchid (*Oeceoclades maculata*) in Neotropics ». *Plant Biosystems - An International Journal Dealing with all Aspects of Plant Biology* 148, no 5 (3 septembre 2014): 1049 55. <https://doi.org/10.1080/11263504.2013.824042>.

Lastiri-Hernández, M. A., G. Cruz-Cárdenas, D. Álvarez-Bernal, M. Vázquez-Sánchez, et K. Bermúdez-Torres. « Ecological Niche Modeling for Halophyte Species with Possible Anthropogenic Use in Agricultural Saline Soils ». *Environmental Modeling & Assessment*, 31 janvier 2020. <https://doi.org/10.1007/s10666-020-09690-1>.

Lembrechts, J, Jonathan Lenoir, Nina Roth, Tarek Hattab, Ann Milbau, Sylvia Haider, Loic Pellissier, et al. « Comparing temperature data sources for use in species distribution models: From in-situ logging to remote sensing ». *Global Ecology and Biogeography* 28, no 11 (novembre 2019): 1578 96. <https://doi.org/10.1111/geb.12974>.

Li, Guiying, Zhenlong Cheng, Dengsheng Lu, Wei Lu, Jianqin Huang, Junjun Zhi, et Shaojin Li. « Examining hickory plantation expansion and evaluating suitability for it using multitemporal satellite imagery and ancillary data ». *Applied Geography* 109 (août 2019): UNSP 102035. <https://doi.org/10.1016/j.apgeog.2019.102035>.

Liu, Xiang, Huiyu Liu, Haibo Gong, Zhenshan Lin, et Shicheng Lv. « Applying the One-Class Classification Method of Maxent to Detect an Invasive Plant *Spartina Alterniflora* with Time-Series Analysis ». *Remote Sensing* 9, no 11 (novembre 2017): 1120. <https://doi.org/10.3390/rs9111120>.

Liu, Yu, Ping Huang, Furong Lin, Wenyun Yang, Hannes Gaisberger, Kettle Christopher, et Yongqi Zheng. « MaxEnt modelling for predicting the potential distribution of a near threatened rosewood species (*Dalbergia cultrata* Graham ex Benth) ». *Ecological Engineering* 141 (2019): 105612.

Long, A.L., K.M. Kettenring, C.P. Hawkins, et C.M.U. Neale. « Distribution and Drivers of a Widespread, Invasive Wetland Grass, *Phragmites australis*, in Wetlands of the Great Salt Lake, Utah, USA ». *Wetlands* 37, no 1 (2017): 45 57. <https://doi.org/10.1007/s13157-016-0838-4>.

Lopatin, J., K. Dolos, T. Kattenborn, et F.E. Fassnacht. « How canopy shadow affects invasive plant species classification in high spatial resolution remote sensing ». *Remote Sensing in Ecology and Conservation* 5, no 4 (2019): 302 17. <https://doi.org/10.1002/rse2.109>.

Mack, Benjamin, Ribana Roscher, Stefanie Stenzel, Hannes Feilhauer, Sebastian Schmidtlein, et Björn Waske. « Mapping Raised Bogs with an Iterative One-Class Classification Approach ». *ISPRS Journal of Photogrammetry and Remote Sensing* 120 (1 octobre 2016): 53 64. <https://doi.org/10.1016/j.isprsjprs.2016.07.008>.

Mack, Benjamin, et Björn Waske. « In-depth comparisons of MaxEnt, biased SVM and one-class SVM for one-class classification of remote sensing data ». *Remote Sensing Letters* 8, no 3 (4 mars 2017): 290 99. <https://doi.org/10.1080/2150704X.2016.1265689>.

Malahlela, Oupa E., Clement Adjorlolo, et Jane M. Olwoch. « Mapping the spatial distribution of *Lippia javanica* (Burm. f.) Spreng using Sentinel-2 and SRTM-derived topographic data in malaria endemic environment ». *Ecological Modelling* 392 (24 janvier 2019): 147 58. <https://doi.org/10.1016/j.ecolmodel.2018.11.020>.

Malavasi, M., V. Barták, T. Jucker, A.T. Rosario Acosta, M.L. Carranza, et M. Bazzichetto. « Strength in numbers: Combining multi-source remotely sensed data to model plant invasions in coastal dune ecosystems ». *Remote Sensing* 11, no 3 (2019). <https://doi.org/10.3390/rs11030275>.

McCartney, Kevin R., Sunil Kumar, Sharlene E. Sing, et Sarah M. Ward. « Using invaded-range species distribution modeling to estimate the potential distribution of *Linaria* species and their hybrids in the US northern Rockies ». *Invasive Plant Science and Management* 12, no 2 (juin 2019): 97 111. <https://doi.org/10.1017/inp.2019.15>.

Monteiro, Antonio, João Gonçalves, Rui Fernandes, Susana Alves, Bruno Marcos, Richard Lucas, Ana Teodoro, et João Honrado. « Estimating invasion success by non-native trees in a national park combining WorldView-2 very high resolution satellite data and species distribution models ». *Diversity* 9, no 1 (2017): 6.

Montti, Lia, Verónica Piriz Carrillo, Jorgelina Gutiérrez-Angonese, N. Ignacio Gasparri, Roxana Aragón, et H. Ricardo Grau. « The Role of Bioclimatic Features, Landscape Configuration and Historical Land Use in the Invasion of an Asian Tree in Subtropical Argentina ». *Landscape Ecology* 32, no 11 (1 novembre 2017): 2167 85. <https://doi.org/10.1007/s10980-017-0563-2>.

Morales, N.S., et I.C. Fernández. « Land-cover classification using maxent: Can we trust in model quality metrics for estimating classification accuracy? » *Entropy* 22, no 3 (2020). <https://doi.org/10.3390/e22030342>.

Mudereri, Bester Tawona, Elfatih Mohamed Abdel-Rahman, Timothy Dube, Tobias Landmann, Zeyaur Khan, Emily Kimathi, Rachel Owino, et Saliou Niassy. « Multi-source spatial data-based invasion risk modeling of *Striga* (*Striga asiatica*) in Zimbabwe ». *GIScience & Remote Sensing* 57, no 4 (18 mai 2020): 553 71. <https://doi.org/10.1080/15481603.2020.1744250>.

Ndlovu, Phindile, Onesimo Mutanga, Mbulisi Sibanda, John Odindi, et Ian Rushworth. « Modelling potential distribution of bramble (*rubus cuneifolius*) using topographic, bioclimatic and remotely sensed data in the KwaZulu-Natal Drakensberg, South Africa ». *Applied Geography* 99 (octobre 2018): 54 62. <https://doi.org/10.1016/j.apgeog.2018.07.025>.

Neumann, Carsten, Sibylle Itzerott, Gabriele Weiss, Birgit Kleinschmit, et Sebastian Schmidtlein. « Mapping Multiple Plant Species Abundance Patterns - A Multiobjective Optimization Procedure for Combining Reflectance Spectroscopy and Species Ordination ». *Ecological Informatics* 36 (1 novembre 2016): 61 76. <https://doi.org/10.1016/j.ecoinf.2016.10.002>.

Ng, Wai-Tim, Alexandro Candido de Oliveira Silva, Purity Rima, Clement Atzberger, et Markus Immitzer. « Ensemble approach for potential habitat mapping of invasive *Prosopis* spp. in Turkana, Kenya ». *Ecology and Evolution* 8, no 23 (décembre 2018): 11921 31. <https://doi.org/10.1002/ece3.4649>.

Niittynen, P., et M. Luoto. « The importance of snow in species distribution models of arctic vegetation ». *Ecography* 41, no 6 (2018): 1024 37. <https://doi.org/10.1111/ecog.03348>.

Noce, Sergio, Luca Caporaso, et Monia Santini. « Climate Change and Geographic Ranges: The Implications for Russian Forests ». *Frontiers in Ecology and Evolution* 7 (19 mars 2019): 57. <https://doi.org/10.3389/fevo.2019.00057>.

O'Neill, Alexander R. « Evaluating high-altitude Ramsar wetlands in the Eastern Himalayas ». *Global Ecology and Conservation* 20 (octobre 2019): e00715. <https://doi.org/10.1016/j.gecco.2019.e00715>.

Padalia, Hitendra, et Utsav Bahuguna. « Spatial modelling of congruence of native biodiversity and potential hotspots of forest invasive species (FIS) in central Indian landscape ». *Journal for Nature Conservation* 36 (avril 2017): 29 37. <https://doi.org/10.1016/j.jnc.2017.02.001>.

Pau, Stephanie, Erika J. Edwards, et Christopher J. Still. « Improving our understanding of environmental controls on the distribution of C-3 and C-4 grasses ». *Global Change Biology* 19, no 1 (janvier 2013): 184 96. <https://doi.org/10.1111/gcb.12037>.

Peraza-Villarreal, Humberto, Alejandro Casas, Roberto Lindig-Cisneros, et Alma Orozco-Segovia. « The Marceno Agroecosystem: Traditional Maize Production and Wetland Management in Tabasco, Mexico ». *Sustainability* 11, no 7 (1 avril 2019): 1978. <https://doi.org/10.3390/su11071978>.

Pérez Chaves, P., K. Ruokolainen, et H. Tuomisto. « Using remote sensing to model tree species distribution in Peruvian lowland Amazonia ». *Biotropica* 50, no 5 (2018): 758 67. <https://doi.org/10.1111/btp.12597>.

Piironen, Rami, Fabian Ewald Fassnacht, Janne Heiskanen, Eduardo Maeda, Benjamin Mack, et Petri Pellikka. « Invasive tree species detection in the Eastern Arc Mountains biodiversity hotspot using one class classification ». *Remote Sensing of Environment* 218 (1 décembre 2018): 119 31. <https://doi.org/10.1016/j.rse.2018.09.018>.

Pitkanen, Timo P., J. Kumpulainen, J. Lehtinen, M. Sihvonen, et N. Kayhko. « Landscape history improves detection of marginal habitats on semi-natural grasslands ». *Science of the Total Environment* 539 (1 janvier 2016): 359 69. <https://doi.org/10.1016/j.scitotenv.2015.09.003>.

Pompeu, Patricia Vieira, Marco Aurelio Leite Fontes, Mark Mulligan, Inacio Thomaz Bueno, Marinez Ferreira de Siqueira, Fausto Weimar Acerbi Junior, Luciana Hiromi Yoshino Kamino, Maarten J. Waterloo, et L. A. Bruijnzeel. « Assessing Atlantic cloud forest extent and protection status in southeastern Brazil ». *Journal for Nature Conservation* 43 (juin 2018): 146 55. <https://doi.org/10.1016/j.jnc.2018.04.003>.

Pottier, Julien, Zbyněk Malenovský, Achilleas Psomas, Lucie Homolová, Michael E. Schaepman, Philippe Choler, Wilfried Thuiller, Antoine Guisan, et Niklaus E. Zimmermann. « Modelling plant species distribution in alpine grasslands using airborne imaging spectroscopy ». *Biology letters* 10, no 7 (2014): 20140347.

Pouteau, Robin, Jean-Yves Meyer, et Sebastien Larrue. « Using range filling rather than prevalence of invasive plant species for management prioritisation: the case of *Spathodea campanulata* in the Society Islands (South Pacific) ». *Ecological Indicators* 54 (juillet 2015): 87 95. <https://doi.org/10.1016/j.ecolind.2015.02.017>.

Pradervand, Jean-Nicolas, Anne Dubuis, Loic Pellissier, Antoine Guisan, et Christophe Randin. « Very high resolution environmental predictors in species distribution models: Moving beyond topography? » *Progress in Physical Geography-Earth and Environment* 38, no 1 (février 2014): 79 96. <https://doi.org/10.1177/0309133313512667>.

Prins, Erik. « Landsat approaches to map agro-pastoral farming in the wetlands of southern Sudan ». *International Journal of Remote Sensing* 39, no 3 (2018): 854 78. <https://doi.org/10.1080/01431161.2017.1392634>.

Rahimian Boogar, Abdolrahman, Hassan Salehi, Hamid Reza Pourghasemi, et Thomas Blaschke. « Predicting Habitat Suitability and Conserving *Juniperus* Spp. Habitat Using SVM and Maximum Entropy Machine Learning Techniques ». *Water* 11, no 10 (octobre 2019): 2049. <https://doi.org/10.3390/w11102049>.

Ramachandran, Reshma M., Parth Sarathi Roy, V. Chakravarthi, J. Sanjay, et Pawan K. Joshi. « Long-term land use and land cover changes (1920-2015) in Eastern Ghats, India: Pattern of dynamics and challenges in plant species conservation ». *Ecological Indicators* 85 (février 2018): 021 036. <https://doi.org/10.1016/j.ecolind.2017.10.012>.

Räsänen, A., V. Elsakov, et T. Virtanen. « Usability of one-class classification in mapping and detecting changes in bare peat surfaces in the tundra ». *International Journal of Remote Sensing* 40, no 11 (2019): 4083 4103. <https://doi.org/10.1080/01431161.2018.1558376>.

Rebelo, Alanna J., Paul Scheunders, Karen J. Esler, et Patrick Meire. « Detecting, mapping and classifying wetland fragments at a landscape scale ». *Remote Sensing Applications: Society and Environment* 8 (2017): 212 23.

Richard, Kyalo, Elfatih M. Abdel-Rahman, Samira A. Mohamed, Sunday Ekesi, Christian Borgemeister, et Tobias Landmann. « Importance of Remotely-Sensed Vegetation Variables for Predicting the Spatial Distribution of African Citrus Trioza (*Trioza erytreae*) in Kenya ». *Isprs International Journal of Geo-Information* 7, no 11 (novembre 2018): 429. <https://doi.org/10.3390/ijgi7110429>.

Salinas-Rodríguez, M.M., M.J. Sajama, J.S. Gutiérrez-Ortega, P. Ortega-Baes, et A.E. Estrada-Castillón. « Identification of endemic vascular plant species hotspots and the effectiveness of the protected areas for their conservation in Sierra Madre Oriental, Mexico ». *Journal for Nature Conservation* 46 (2018): 6 27. <https://doi.org/10.1016/j.jnc.2018.08.012>.

Schwager, Patrick, et Christian Berg. « Global Warming Threatens Conservation Status of Alpine EU Habitat Types in the European Eastern Alps ». *Regional Environmental Change* 19, no 8 (1 décembre 2019): 2411 21. <https://doi.org/10.1007/s10113-019-01554-z>.

Shiferaw, Hailu, Woldeamlak Bewket, et Sandra Eckert. « Performances of machine learning algorithms for mapping fractional cover of an invasive plant species in a dryland ecosystem ». *Ecology and Evolution* 9, no 5 (mars 2019): 2562 74. <https://doi.org/10.1002/ece3.4919>.

Shiferaw, Hailu, Urs Schaffner, Woldeamlak Bewket, Tena Alamirew, Gete Zeleke, Demel Teketay, et Sandra Eckert. « Modelling the Current Fractional Cover of an Invasive Alien Plant and Drivers of Its Invasion in a Dryland Ecosystem ». *Scientific Reports* 9, no 1 (7 février 2019): 1 12. <https://doi.org/10.1038/s41598-018-36587-7>.

Skowronek, Sandra, Gregory P. Asner, et Hannes Feilhauer. « Performance of one-class classifiers for invasive species mapping using airborne imaging spectroscopy ». *Ecological Informatics* 37 (janvier 2017): 66 76. <https://doi.org/10.1016/j.ecoinf.2016.11.005>.

Skowronek, Sandra, Michael Ewald, Maïke Isermann, Ruben Van de Kerchove, Jonathan Lenoir, Raf Aerts, Jens Warrie, et al. « Mapping an invasive bryophyte species using hyperspectral remote sensing data ». *Biological Invasions* 19, no 1 (janvier 2017): 239 54. <https://doi.org/10.1007/s10530-016-1276-1>.

Skowronek, Sandra, Ruben Van De Kerchove, Bjorn Rombouts, Raf Aerts, Michael Ewald, Jens Warrie, Felix Schiefer, et al. « Transferability of species distribution models for the detection of an invasive alien bryophyte using imaging spectroscopy data ». *International Journal of Applied Earth Observation and Geoinformation* 68 (juin 2018): 61 72. <https://doi.org/10.1016/j.jag.2018.02.001>.

Song, Benqin, Peijun Li, Jun Li, et Antonio Plaza. « One-Class Classification of Remote Sensing Images Using Kernel Sparse Representation ». *Ieee Journal of Selected Topics in Applied Earth Observations and Remote Sensing* 9, no 4 (avril 2016): 1613 23. <https://doi.org/10.1109/JSTARS.2015.2508285>.

Srivastava, Vivek, Verena C. Griess, et Hitendra Padalia. « Mapping invasion potential using ensemble modelling. A case study on *Yushania maling* in the Darjeeling Himalayas ». *Ecological Modelling* 385 (10 octobre 2018): 35 44. <https://doi.org/10.1016/j.ecolmodel.2018.07.001>.

Stenzel, Stefanie, Fabian Ewald Fassnacht, Benjamin Mack, et Sebastian Schmidtlein. « Identification of high nature value grassland with remote sensing and minimal field data ». *Ecological indicators* 74 (2017): 28 38.

Stenzel, Stefanie, Hannes Feilhauer, Benjamin Mack, Annekatrin Metz, et Sebastian Schmidtlein. « Remote sensing of scattered Natura 2000 habitats using a one-class classifier ». *International Journal of Applied Earth Observation and Geoinformation* 33 (2014): 211 17.



Stewart, Laerke, Caroline E. Simonsen, Jens-Christian Svenning, Niels Martin Schmidt, et Loic Pellissier. « Forecasted homogenization of high Arctic vegetation communities under climate change ». *Journal of Biogeography* 45, no 11 (novembre 2018): 2576 87. <https://doi.org/10.1111/jbi.13434>.

Suarez-Seoane, Susana, Borja Jimenez-Alfaro, et Jose Ramon Obeso. « Habitat-partitioning improves regional distribution models in multi-habitat species: a case study with the European bilberry ». *Biodiversity and Conservation* 29, no 3 (mars 2020): 987 1008. <https://doi.org/10.1007/s10531-019-01922-5>.

Tang, Ying, Julie A. Winkler, Andres Vina, Jianguo Liu, Yuanbin Zhang, Xiaofeng Zhang, Xiaohong Li, Fang Wang, Jindong Zhang, et Zhiqiang Zhao. « Uncertainty of future projections of species distributions in mountainous regions ». *Plos One* 13, no 1 (10 janvier 2018): e0189496. <https://doi.org/10.1371/journal.pone.0189496>.

Tang, Ying, Julie A. Winkler, Andres Vina, Fang Wang, Jindong Zhang, Zhiqiang Zhao, Thomas Connor, et al. « Expanding ensembles of species present-day and future climatic suitability to consider the limitations of species occurrence data ». *Ecological Indicators* 110 (mars 2020): 105891. <https://doi.org/10.1016/j.ecolind.2019.105891>.

Thapa, Sunil, Vishwas Chitale, Srijana Joshi Rijal, Neha Bisht, et Bharat Babu Shrestha. « Understanding the dynamics in distribution of invasive alien plant species under predicted climate change in Western Himalaya ». *Plos One* 13, no 4 (17 avril 2018): e0195752. <https://doi.org/10.1371/journal.pone.0195752>.

Tomlinson, Sean, Wolfgang Lewandowski, Carole P. Elliott, Ben P. Miller, et Shane R. Turner. « High-resolution distribution modeling of a threatened short-range endemic plant informed by edaphic factors ». *Ecology and evolution* 10, no 2 (2020): 763 77.

Tredennick, Andrew T., Mevin B. Hooten, Cameron L. Aldridge, Collin G. Homer, Andrew R. Kleinesselink, et Peter B. Adler. « Forecasting climate change impacts on plant populations over large spatial extents ». *Ecosphere* 7, no 10 (octobre 2016): e01525. <https://doi.org/10.1002/ecs2.1525>.

Truong, Tuyet T. A., Giles E. St J. Hardy, et Margaret E. Andrew. « Contemporary Remotely Sensed Data Products Refine Invasive Plants Risk Mapping in Data Poor Regions ». *Frontiers in Plant Science* 8 (15 mai 2017): 770. <https://doi.org/10.3389/fpls.2017.00770>.

Tuomisto, Hanna, Jasper Van Doninck, Kalle Ruokolainen, Gabriel M. Moulatlet, Fernando O. G. Figueiredo, Anders Siren, Glenda Cardenas, Samuli Lehtonen, et Gabriela Zuquim. « Discovering floristic and geoecological gradients across Amazonia ». *Journal of Biogeography* 46, no 8 (août 2019): 1734 48. <https://doi.org/10.1111/jbi.13627>.

Vacchiano, Giorgio, et Renzo Motta. « An improved species distribution model for Scots pine and downy oak under future climate change in the NW Italian Alps ». *Annals of Forest Science* 72, no 3 (mai 2015). <https://doi.org/10.1007/s13595-014-0439-4>.

Van Doninck, Jasper, Mirkka M. Jones, Gabriela Zuquim, Kalle Ruokolainen, Gabriel M. Moulatlet, Anders Siren, Glenda Cardenas, Samuli Lehtonen, et Hanna Tuomisto. « Multispectral canopy reflectance improves spatial distribution models of Amazonian understory species ». *Ecography* 43, no 1 (janvier 2020): 128 37. <https://doi.org/10.1111/ecog.04729>.

Wagner, Fabien H., Alber Sanchez, Yuliya Tarabalka, Rodolfo G. Lotte, Matheus P. Ferreira, Marcos P. M. Aïdar, Emanuel Gloor, Oliver L. Phillips, et Luiz E. O. C. Aragão. « Using the U-Net Convolutional Network to Map Forest Types and Disturbance in the Atlantic Rainforest with Very High Resolution Images ». *Remote Sensing in Ecology and Conservation* 5, no 4 (2019): 360 75. <https://doi.org/10.1002/rse2.111>.

Wang, Ophelia, Luke J. Zachmann, Steven E. Sesnie, Aaryn D. Olsson, et Brett G. Dickson. « An Iterative and Targeted Sampling Design Informed by Habitat Suitability Models for Detecting Focal Plant Species over Extensive Areas ». *PLOS ONE* 9, no 7 (14 juillet 2014): e101196. <https://doi.org/10.1371/journal.pone.0101196>.

West, A.M., P.H. Evangelista, C.S. Jarnevich, S. Kumar, A. Swallow, M.W. Luizza, et S.M. Chignell. « Using multi-date satellite imagery to monitor invasive grass species distribution in post-wildfire landscapes: An iterative, adaptable approach that employs open-source data and software ».

International Journal of Applied Earth Observation and Geoinformation 59 (2017): 135 46.  
<https://doi.org/10.1016/j.jag.2017.03.009>.

West, Amanda M., Paul H. Evangelista, Catherine S. Jarnevich, et Darin Schulte. « A tale of two wildfires; testing detection and prediction of invasive species distributions using models fit with topographic and spectral indices ». *Landscape Ecology* 33, no 6 (juin 2018): 969 84.  
<https://doi.org/10.1007/s10980-018-0644-x>.

West, Amanda M., Sunil Kumar, Cynthia S. Brown, Thomas J. Stohlgren, et Jim Bromberg. « Field validation of an invasive species Maxent model ». *Ecological Informatics* 36 (2016): 126 34.

Wilson, O.J., R.J. Walters, F.E. Mayle, D.V. Lingner, et A.C. Vibrans. « Cold spot microrefugia hold the key to survival for Brazil's Critically Endangered Araucaria tree ». *Global Change Biology* 25, no 12 (2019): 4339 51. <https://doi.org/10.1111/gcb.14755>.

Wueest, Rafael O., Ariel Bergamini, Kurt Bollmann, et Andri Baltensweiler. « LiDAR data as a proxy for light availability improve distribution modelling of woody species ». *Forest Ecology and Management* 456 (15 janvier 2020): 117644. <https://doi.org/10.1016/j.foreco.2019.117644>.

Yang, X.-Q., S.P.S. Kushwaha, S. Saran, J. Xu, et P.S. Roy. « Maxent modeling for predicting the potential distribution of medicinal plant, *Justicia adhatoda* L. in Lesser Himalayan foothills ». *Ecological Engineering* 51 (2013): 83 87. <https://doi.org/10.1016/j.ecoleng.2012.12.004>.

Zald, Harold S. J., Janet L. Ohmann, Heather M. Roberts, Matthew J. Gregory, Emilie B. Henderson, Robert J. McGaughey, et Justin Braaten. « Influence of lidar, Landsat imagery, disturbance history, plot location accuracy, and plot size on accuracy of imputation maps of forest composition and structure ». *Remote Sensing of Environment* 143 (5 mars 2014): 26 38. <https://doi.org/10.1016/j.rse.2013.12.013>.

Zwiener, V.P., A.A. Padial, M.C.M. Marques, F.V. Faleiro, R. Loyola, et A.T. Peterson. « Planning for conservation and restoration under climate and land use change in the Brazilian Atlantic Forest ». *Diversity and Distributions* 23, no 8 (2017): 955 66. <https://doi.org/10.1111/ddi.12588>.
